1 **Antibody responses to SARS-CoV-2 vaccination in patients with acute leukaemia and high**  
2 **risk MDS on active anti-cancer therapies**

3  
4 **Chan, W.Y.<sup>1</sup>, Zhu, C.<sup>1,2</sup>, Sanchez, E.<sup>3</sup>, Gupta, R.<sup>1,2</sup>, Fielding, A.K.<sup>1,2</sup>, Khwaja, A.<sup>1,2</sup>, Payne,**  
5 **E.M.<sup>1,2\*</sup>, O’Nions, J.<sup>1\*</sup>**

6  
7 **AFFILIATIONS:**<sup>1</sup>Department of Haematology, University College London NHS Foundation Trust,  
8 London, UK. <sup>2</sup>UCL Cancer Institute, University College London, London, UK, <sup>3</sup>Department of Virology,  
9 University College London NHS Foundation Trust, London, UK. \*Co-corresponding authors.

10  
11 **Abstract**

12 Patients with haematological malignancies, such as acute leukaemia and high-risk MDS (HR-MDS),  
13 have significantly increased mortality and morbidity from COVID-19. However vaccine efficacy in  
14 these patients and the impact of systemic anti-cancer therapy (SACT) on vaccine response remains  
15 to be fully established. SARS-CoV-2 antibody responses in 53 patients with ALL, AML or HR-MDS  
16 receiving SACT were characterised following two doses of either BNT162b2 or ChAdOx1nCoV-19. All  
17 patients were tested for anti-S antibodies after 2 doses, 60% after the first dose and anti-N antibody  
18 testing was performed on 46 patients (87%). Seropositivity rates after 2 vaccine doses were 95% in  
19 AML/HR-MDS patients and 79% in ALL. After stratification by prior SARS-CoV-2 infection, naïve  
20 patients with AML/HR-MDS had higher seroconversion rates and median anti-S antibody titres  
21 compared to ALL (median 291U/mL versus 5.06U/mL), and significant increases in anti-S titres with  
22 consecutive vaccine doses, not seen in ALL. No difference was seen in serological response between  
23 patients receiving intensive chemotherapy or non-intensive therapies (HMA) but significantly  
24 lower titres were present in AML/HR-MDS patients who received non-toxic based regimens.

25 compared to other therapies. All ALL patients received intensive chemotherapy, with no further  
26 impact of anti-CD20 immunotherapy on serological response. Understanding the impact of disease  
27 subtypes and therapy on vaccine response is essential to enable decisions on modifying or delaying  
28 treatment in the context of either SARS-CoV-2 infection or vaccination.

29

## 30 **Introduction**

31 SARS-CoV-2 vaccination represents an important measure to protect the population from COVID-19,  
32 showing excellent rates of seroconversion and efficacy in preventing severe disease<sup>1,2</sup>. However,  
33 vaccine efficacy remains to be fully-established in patients with haematological malignancy who have  
34 significantly increased mortality and morbidity from COVID-19<sup>3,4,5</sup>. Variable humoral responses to  
35 SARS-CoV-2 vaccination have been reported, with the lowest seroconversion rates in patients with B-  
36 cell malignancies and those receiving systemic anti-cancer therapy (SACT)<sup>6,7,8,9</sup>. Encouraging  
37 seroconversion rates in patients with acute lymphoblastic leukaemia (ALL), acute myeloid leukaemia  
38 (AML) and HR-MDS have been reported within larger cohort studies of patients with a variety of  
39 haematological cancers<sup>7,10,11,12</sup>. However, the impact of SACT on vaccine responses in patients with  
40 ALL, AML and high-risk myelodysplastic syndrome (HR-MDS) remains unclear, but has important  
41 implications for clinical management. Here we have addressed this and report SARS-CoV-2 antibody  
42 responses following vaccination in patients with ALL, AML or HR-MDS receiving SACT .

43

## 44 **Methods**

45 Demographics, SACT history and laboratory parameters were collected from electronic health records  
46 for patients with acute leukaemias and HR-MDS receiving or recently completed SACT, who had two  
47 doses of SARS-CoV-2 vaccine (BNT162b2 or ChAdOx1nCoV-19) between December 2020 and July 2021  
48 (with 8 to 12 weeks between doses as per UK vaccination programme). Serological testing was  
49 performed using the Roche Elecsys anti-SARS-CoV-2 enzyme immunoassays. All patients were

50 consented for excess serum to be stored and used as part of the “UCL Biobank for Studying Health  
51 and Disease, Haematology Project” (ref.NC10.13).

52

### 53 **Results**

54 Fifty three patients (62% AML, 11% HR-MDS, 26% ALL), underwent serological testing after receiving  
55 2 vaccine doses (72% BNT162b2, 15% ChAdOx1nCoV-19, 13% unknown), Table 1. Median age was 53  
56 (range 18-76) and all received or had recently completed SACT at time of vaccination; 21 patients  
57 (39.6%) received intensive chemotherapy, 37.7% venetoclax-combination therapy (with azacitidine,  
58 low-dose cytarabine or gilteritinib), 16.9% non-intensive (azacitidine) and 5.6% B-cell directed  
59 immunotherapy (blinatumomab, CD19-CART). Forty-six (87%) underwent testing for anti-N  
60 antibodies, identifying 11 (24%) showing previous SARS-CoV-2 infection. All patients were tested for  
61 anti-S antibodies after 2 doses (median 43 days post-dose) and 60% after first dose (median 37.5 days).  
62 A trend towards higher rates of seropositivity was seen in AML and HR-MDS compared to ALL after 2  
63 doses (95% compared to 79%,  $p=0.06$ , Figure 1A). The seropositivity rate after dose one in all patients  
64 was 75% (median anti-S titre 7.275U/ml [IQR 0.64-184]), rising to 91% following dose two (median  
65 249U/ml [IQR 24.95-1721]), Figure 1B. There was no significant difference in anti-S seropositivity rate  
66 or median antibody titre after dose one between patients with AML/HR-MDS and ALL (74% vs 78%  
67 seropositive, median titres 5.90U/ml [IQR 0.58-56.70] versus 11.4U/ml [IQR 0.61-1380]). However,  
68 patients with AML/HR-MDS showed significantly increased titres following dose two (median  
69 333U/mL [IQR 86.60-1971],  $p=0.0005$ , 95% seropositive), compared to ALL (median titre 8.40 [IQR  
70 2.34-669],  $p=0.38$ , 79% seropositive).

71 To define vaccine-induced seroconversion, we analysed responses in patients with no prior SARS-CoV-  
72 2 infection and negative anti-N serology (Figure 1C, Figure S1A). Anti-S seroconversion was 91% with  
73 median titre of 132U/mL (IQR 7.5-931). Seroconversion rates and median titres in SARS-CoV-2 naïve  
74 patients remained higher in the myeloid compared to lymphoid cohort (median 235U/mL [IQR 82.15-

75 1670] versus 5.06U/mL [1.69-175.6],  $p=0.0079$ ). A marked increase in titres was seen following  
76 consecutive vaccinations in the AML/HR-MDS cohort (medians post dose one and two of 1.1U/mL and  
77 95.8U/mL,  $p=0.08$ ), but only minimal increase in ALL (0.817U/ml to 4.80U/mL,  $p>0.99$ ) (Figures 1D, E,  
78 F, Figures S1B, C). Previous SARS-CoV-2 infection was associated with higher antibody titres after two  
79 vaccinations in patients with AML/HR-MDS (median 2500U/mL [IQR 141-2500]) compared to ALL  
80 (median 1541U/mL [IQR 574.5-2500], although this did not reach significance ( $p=0.77$ ) (Figure 1G,  
81 Figures S1D,E). This is consistent with reports of higher overall post-vaccination antibody titres in  
82 individuals with prior natural infection<sup>13,14</sup>.

83 Next we investigated the impact of SACT type on serological responses. No significant difference in  
84 seropositivity or antibody titres was seen in AML/HR-MDS patients receiving intensive (30% patients)  
85 compared to non-intensive chemotherapy (azacitidine, 23%); however, anti-S titres were significantly  
86 reduced in patients on venetoclax-based regimens (51% of myeloid patients, median 158.5U/mL [IQR  
87 34.85-873],  $p=0.04$ ). This was independent of previous SARS-CoV-2 infection (Figure 1H, Figure S2A).  
88 The majority of ALL patients (79%) received intensive treatment (as per current UKALL protocols) and  
89 had low anti-S titres post vaccination (Figure 1A,B,C,F). Anti-B cell directed therapy is associated with  
90 poor serological response to SARS-CoV-2 vaccination. Five ALL patients received Rituximab but no  
91 effect was seen on anti-S response, albeit in small numbers (Figure S2B,C).

92 Here we report the majority of patients with acute leukaemias and HR-MDS develop detectable anti-  
93 S antibodies following two doses of SARS-CoV-2 vaccine, with seropositivity rates of 91%. SARS-CoV-  
94 2 naïve patients with AML/HR-MDS showed significantly increased antibody responses following  
95 consecutive vaccine doses, whereas ALL patients tended towards very low titres with a minimal  
96 increase, and it remains to be established whether this is sufficient to confer protective immunity.  
97 While patients with acute leukaemias can generate robust serological responses to natural infection,  
98 this was not the case for all patients following vaccination, highlighting the importance of measuring  
99 antibody titres, not just seropositivity, and to consider prior SARS-CoV-2 infection influencing vaccine

100 responses in this high-risk group. Understanding the impact of SACT on SARS-CoV-2 vaccine responses  
101 is essential to guide decisions on treatment choice and timing. Reduced serological responses in  
102 patients receiving B-cell directed therapy and small molecule inhibitors (particularly BTKi, venetoclax,  
103 anti-CD20 and anti-CD19 immunotherapies) have been reported in mature B-cell neoplasms and  
104 myeloma, but not acute leukaemias<sup>6,9,11,15</sup>. While we found no significant difference in antibody titres  
105 or seroconversion in AML/HR-MDS patients receiving intensive or non-intensive therapy, patients  
106 receiving venetoclax-based regimens showed reduced antibody levels. Notably, ALL with intensive  
107 chemotherapy displayed almost uniformly low antibody titres (<10U/ml) after two vaccine doses,  
108 regardless of additional B-cell directed therapy. We propose that further work to define correlates of  
109 vaccine protection (humoral and T cell responses), the impact of SACT regimens on the  
110 magnitude/duration of responses, and the value of additional booster doses will have clear  
111 implications for this vulnerable group and should be priority questions for larger prospective studies.

112

### 113 **Contributions**

114 JO conceived of the study, performed data collection, data analysis, literature search, and manuscript  
115 writing and revision; WC data collection, data analysis, manuscript writing, and revision; CZ performed  
116 data collection, manuscript review and revision; EP conceived of study, manuscript review and  
117 revision; ES data collection, manuscript review and revision; AF, AK, RG, manuscript review and  
118 revision.

119 **Declaration of interest:** All authors declare no conflicts of interest.

### 120 **Acknowledgements**

121 We are extremely grateful to all the patients who participated in this study and to the NHS staff that  
122 provided their clinical care. EMP is supported by a CRUK Advanced Clinician Scientist Fellowship (Grant  
123 No. A24873). RG acknowledges funding from Cure Cancer@ UCL.

124

125 **References**

126

- 127 1. Polack FP. et al. Safety and efficacy of the BNT162b2 mRNA Covid-19 vaccine. *New*  
128 *England Journal of Medicine* **383**: 2603–15 (2020)
- 129 2. Voysey, M. *et al.* Single-dose administration and the influence of the timing of the  
130 booster dose on immunogenicity and efficacy of ChAdOx1 nCoV-19 (AZD1222)  
131 vaccine: a pooled analysis of four randomised trials. *Lancet* **397**, 881–91 (2021)
- 132 3. Vijenthira A. *et al.* Outcomes of patients with hematologic malignancies and COVID-  
133 19: a systematic review and meta-analysis of 3377 patients. *Blood* **136**:2881–92 (2020)
- 134 4. Wood WA. *et al.* Outcomes of patients with hematologic malignancies and COVID-19:  
135 A report from the ASH Research Collaborative Data Hub. *Blood Advances* **4(23)**: 5966–  
136 5975 (2020)
- 137 5. Passamonti, F. *et al.* Clinical characteristics and risk factors associated with COVID-19  
138 severity in patients with haematological malignancies in Italy: a retrospective,  
139 multicentre, cohort study. *Lancet Haematology* **7(10)**: e737–e745 (2020).
- 140 6. Addeo, A. *et al.* Immunogenicity of SARS-CoV-2 messenger RNA vaccines in patients  
141 with cancer. *Cancer Cell* **39(8)**, 1091-1098 (2021)
- 142 7. Greenberger, LM. et al. Antibody response to SARS-CoV-2 vaccines in patients with  
143 hematologic malignancies. *Cancer Cell* **39(8)**, 1031-1033 (2021)
- 144 8. Herishanu, Y. et al. Efficacy of the BNT162b2 MRNA COVID-19 Vaccine in Patients with  
145 Chronic Lymphocytic Leukemia. *Blood* **137**, 3165–3173 (2021).

- 146 9. Fox, TA. *et al.* Low seropositivity and suboptimal neutralisation rates in patients fully  
147 vaccinated against COVID-19 with B-cell malignancies, *British Journal of*  
148 *Haematology* **195(5)**, 706-709 (2021).
- 149 10. Malard, F. *et al.* Weak immunogenicity of SARS-CoV-2 vaccine in patients with  
150 hematologic malignancies. *Blood Cancer Journal* **11**, 142 (2021)
- 151 11. Tzarfati, KH. *et al.* BNT162b2 COVID-19 Vaccine is significantly less effective in patients  
152 with hematologic malignancies. *Am J Hematol* **96**, 1195–203 (2021)
- 153 12. Chung, DJ. *et al.* Disease- and Therapy-Specific Impact on Humoral Immune Responses  
154 to COVID-19 Vaccination in Hematologic Malignancies. *Blood Cancer Discovery* **2(6)**,  
155 568-576 (2021)
- 156 13. Anichini, G. *et al.* SARS-CoV-2 Antibody Response in Persons with Past Natural  
157 Infection. *N Engl J Med* **385**, 90-92 (2021)
- 158 14. Predecki, M. *et al.* Effect of previous SARS-CoV-2 infection on humoral and T-cell  
159 responses to single-dose BNT162b2 vaccine. *Lancet* **397(10280)**, 1178-1181 (2021)
- 160 15. Maneikis, K. *et al.* Immunogenicity of the BNT162b2 COVID-19 mRNA vaccine and  
161 early clinical outcomes in patients with haematological malignancies in Lithuania: a  
162 national prospective cohort study. *Lancet Haematol* **8(8)**, e583-e592 (2021)

163

164

## 165 **Figure legends**

166 **Figure 1:** Serological responses in patients with acute leukaemia and HR-MDS after SARS-CoV-2  
167 vaccination. All figures are presented with a Log10 scale on the y-axis. A seropositive result is defined  
168 as  $\geq 0.8$ U/mL, upper limit of the assay  $>2500$ U/ml \*lower limit of assay, \*\*upper limit of assay. **1A:**  
169 Seropositivity for anti-S antibodies in all patients following two doses of SARS-CoV-2 vaccine,

170 categorized by disease subtype. **1B:** Anti-S antibody titres following the first and second vaccine doses  
171 by disease category. **1C:** Serological response to two vaccination doses in patients with no previous  
172 SARS-CoV-2 infection. **1D:** Seroconversion rates in patients with no previous SARS-CoV-2 infection,  
173 after one and two doses of vaccine (Paired pre dose, post first dose and second dose); in patients with  
174 AML or HR-MDS (**1E**) and in patients with ALL (**1F**). **1G:** Serological response in patients with previous  
175 SARS-CoV-2 infection categorized by disease subtypes. **1H:** Serological response following two doses  
176 of vaccine in AML/HR-MDS treated with venetoclax-based regimens.

177

178

179



**Table 1: Patient demographics, disease and treatment characteristics in the overall cohort and by disease subgroup.**

| Characteristics                                                              | Total<br>n=53         | Negative<br>baseline<br>n=35 | Positive<br>baseline<br>n=11 | Myeloid (AML<br>+ HR-MDS)<br>n=39 | Lymphoid<br>n=14       |
|------------------------------------------------------------------------------|-----------------------|------------------------------|------------------------------|-----------------------------------|------------------------|
| Gender (% male)                                                              | 30 (57)               | 18 (51)                      | 6 (55)                       | 21 (54)                           | 9 (64)                 |
| Median age [range]                                                           | 53 [18-76]            | 52 [18-76]                   | 43 [22-73]                   | 63 [21-76]                        | 37 [18-57]             |
| Diagnosis (%):                                                               |                       |                              |                              |                                   |                        |
| AML/Myeloid Sarcoma                                                          | 28 (53)               | 19 (54)                      | 4 (36)                       | 28 (72)                           | -                      |
| APML                                                                         | 5 (9)                 | 3 (9)                        | 2 (18)                       | 5 (13)                            | -                      |
| HR MDS                                                                       | 6 (11)                | 4 (11)                       | 1 (9)                        | 6 (15)                            | -                      |
| B-ALL                                                                        | 10 (19)               | 7 (20)                       | 3 (27)                       | -                                 | 10 (71)                |
| T-ALL                                                                        | 4 (8)                 | 2 (6)                        | 1 (9)                        | -                                 | 4 (29)                 |
| SARS-CoV-2 infection*(%)                                                     | 11/46 (24)            | -                            | -                            | 7/33 (21)                         | 4/13 (31)              |
| Treatment (% total patients):                                                |                       |                              |                              |                                   |                        |
| Intensive AML chemotherapy                                                   | 10 (19)               | 7 (20)                       | 3 (27)                       | 10 (26)                           | -                      |
| Venetoclax based regimens                                                    | 20 (38)               | 12 (34)                      | 3 (27)                       | 20 (51)                           | -                      |
| - Ven & Aza                                                                  | 16                    | 10                           | 2                            | 16                                | -                      |
| - Ven & LDAC                                                                 | 2                     | 1                            | 0                            | 2                                 | -                      |
| - Ven & Gilt                                                                 | 1                     | 1                            | 0                            | 1                                 | -                      |
| - Ven, Gilt & Aza                                                            | 1                     | 0                            | 1                            | 1                                 | -                      |
| Non intensive AML therapy                                                    | 9 (17)                | 7 (20)                       | 1 (10)                       | 9 (23)                            | -                      |
| UKALL chemotherapy                                                           | 11 (21)               | 9 (26)                       | 2 (20)                       | -                                 | 11 (79)                |
| - Plus Rituximab                                                             | 5                     | 3                            | 2                            | -                                 | 5                      |
| Other B cell directed therapy                                                | 3 (6)                 | 1 (3)                        | 2 (20)                       | -                                 | 3 (21)                 |
| - Blinatumumab                                                               | 2                     | 1                            | 1                            | -                                 | 2                      |
| - CAR-T                                                                      | 1                     | 0                            | 1                            | -                                 | 1                      |
| Seropositive**, 1 dose (%)                                                   | 24/32 (75)            | 13/18 (72)                   | 10/11 (91)                   | 17/23 (74)                        | 7/9 (78)               |
| Seropositive**, 2 doses (%)                                                  | 48/53 (91)            | 32/35 (91)                   | 10/11 (91)                   | 37/39 (95)                        | 11/14 (79)             |
| Seroconversion*** post 2 doses (%)                                           | 32/35 (91)            | 32/35 (91)                   | -                            | 25/26 (96)                        | 7/9 (78)               |
| Vaccine type (%):                                                            |                       |                              |                              |                                   |                        |
| BNT162b2                                                                     | 38 (72)               | 23 (66)                      | 11 (100)                     | 26 (67)                           | 12 (86)                |
| ChAdOx1 nCoV-19                                                              | 8 (15)                | 6 (17)                       | 0 (0)                        | 8 (21)                            | 0 (0)                  |
| unknown                                                                      | 7 (13)                | 6 (17)                       | 0 (0)                        | 5 (13)                            | 2 (14)                 |
| Median time (days) from first dose to serology [range]                       | 37.5 [24-86]          | 31 [24-79]                   | 44 [24-79]                   | 39 [24-79]                        | 36 [26-86]             |
| Time (days) from second dose to serology [range]                             | 43 [13-133]           | 41 [13-133]                  | 45 [15-72]                   | 40 [13-133]                       | 48 [15-84]             |
| Median titres post first dose in all patients U/mL (IQR)                     | 7.275 U/mL (0.64-184) | 4.42 U/mL (0.4-17.10)        | 2500 U/mL (259-2500)         | 5.90 U/mL (0.58-56.70)            | 11.40 U/mL (0.61-1380) |
| Median titres post first dose in patients with negative baseline U/mL (IQR)  | N/A                   | 4.42 U/mL (0.4-17.10)        | N/A                          | 5.90 U/mL (0.62-38.35)            | 0.82 U/mL (0.4-9.64)   |
| Median titres post second dose in all patients U/mL (IQR)                    | 249 U/mL (24.95-1721) | 132 U/mL (7.5-931)           | 2500 U/mL (417-2500)         | 333 U/mL (86.80-1971)             | 8.40 U/mL (2.34-669)   |
| Median titres post second dose in patients with negative baseline U/mL (IQR) | N/A                   | 132 U/mL (7.5-931)           | N/A                          | 235U/mL (82.15-1670)              | 5.06U/mL (1.69-175.6)  |

\*SARS-CoV-2 infection defined by presence of anti-N (nucleocapsid) antibodies.

\*\*SARS-CoV-2 seropositive defined by presence of anti-S (Spike) antibodies.

\*\*\*Seroconversion defined by the detection of anti-S antibodies in patients who had previously undetectable anti-S antibodies.

Definitions: AML, acute myeloid leukaemia; HR-MDS, high risk MDS; B-ALL, B-lymphoblastic leukaemia; T-ALL, T lymphoblastic leukaemia; Ven, venetoclax; Aza, azacitidine; LDAC, low dose cytarabine; Gilt, gilteritinib; UKALL, (UK ALL chemotherapy 2011, 2014 protocols [anthracycline, vincristine, cytarabine, cyclophosphamide, peg-asparaginase, dexamethasone])

**Figure 1: Serological responses in patients with acute leukaemia and HR-MDS after SARS-CoV-2 vaccination**

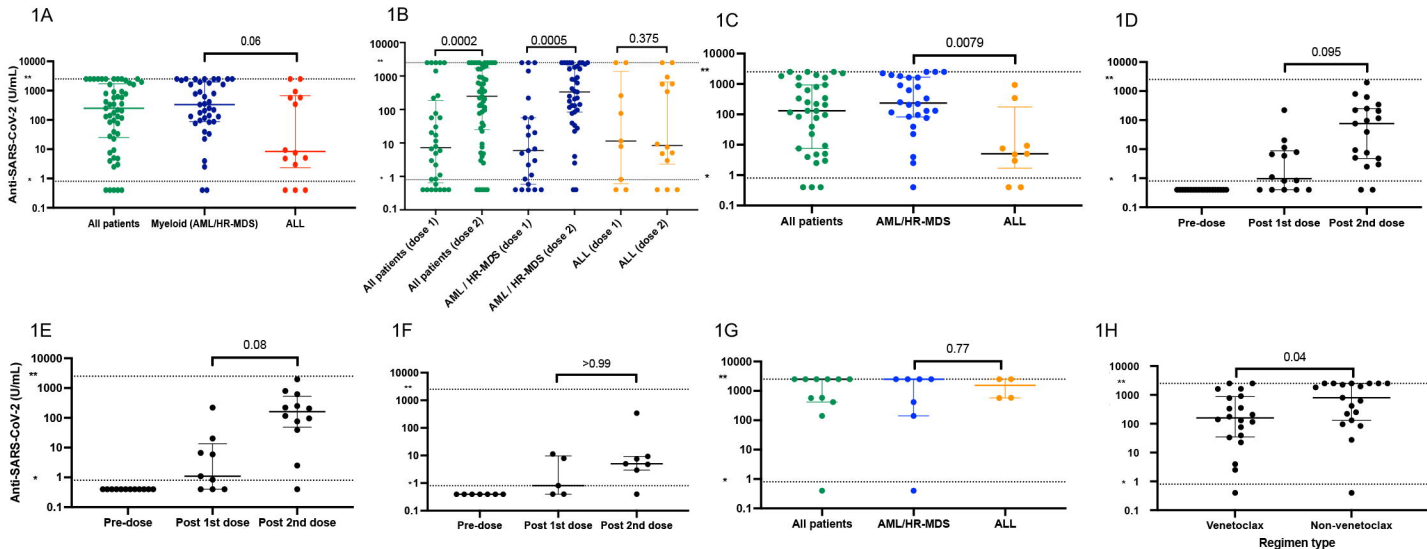

Source: https://medrxiv.org/content/10.1101/2022.04.05.22273371v1.full.pdf
